# Supplementary material
Source: publisher figshare collection journal article supplement (https://gsajournals.figshare.com/articles/dataset/_/7152065)
Supplement: Supplementary file 1 [file 1]

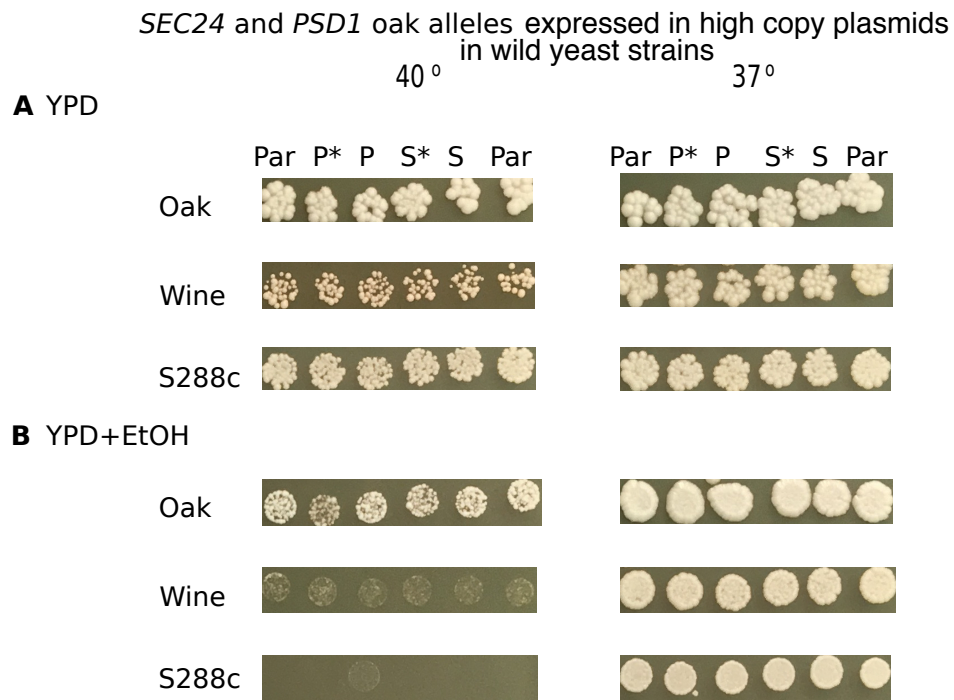

Figure S4. Phenotypes of resistant wild yeast strains, Oak (YPS153), Wine (YJF181) and S288c (YJF173), containing high copy Oak allele plasmids grown at 40°. (A) Growth on YPD at 40° is diminished for Wine and S288c, but not for Oak. (B) High copy plasmids had no effect on growth at 40° on YPD+ethanol. The controls were grown at 37°. All are shown at three days of growth. The YPD grown strains are shown at a 10-fold higher dilution than those grown on YPD/EtOH. P\* = *PSD1* high copy, P = *PSD1* CEN plasmid; S\* = *SEC24* high copy, S = *SEC24* CEN plasmid; Par = parent strain.
