# Supplementary material
Source: publisher figshare collection journal article supplement (https://gsajournals.figshare.com/articles/dataset/_/7152065)
Supplement: Supplementary file 2 [file 1]

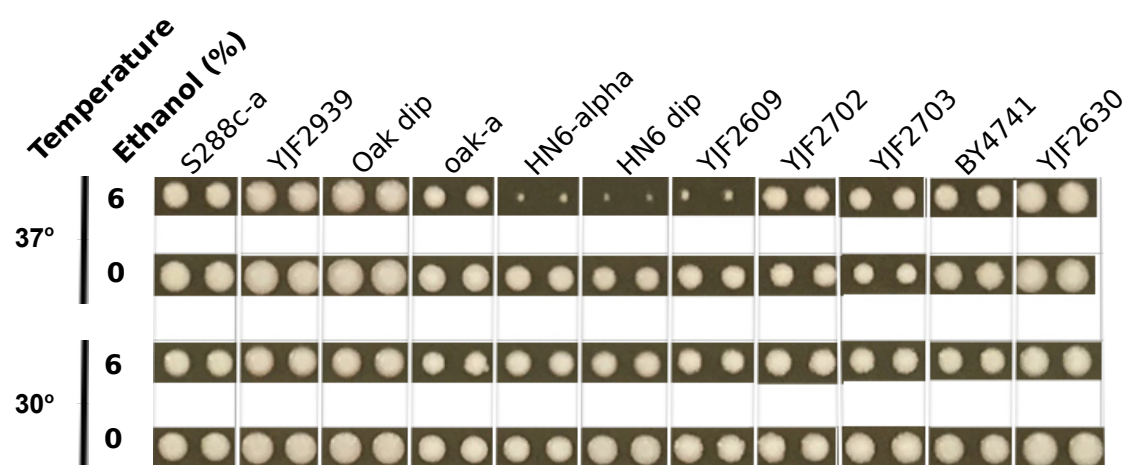

Figure S1. Ethanol and heat sensitivity of control strains. Controls were grown on YPD with and without 6% ethanol at 30° and 37°. YJF2939 is the HN6- $\alpha$  x Oak-a hybrid. YJF2630 is the HN6- $\alpha$  x BY4741 hybrid.
