# Supplementary material
Source: publisher figshare collection journal article supplement (https://gsajournals.figshare.com/articles/dataset/_/7152065)
Supplement: Supplementary file 3 [file 1]

## A SEC24 Protein Alignment

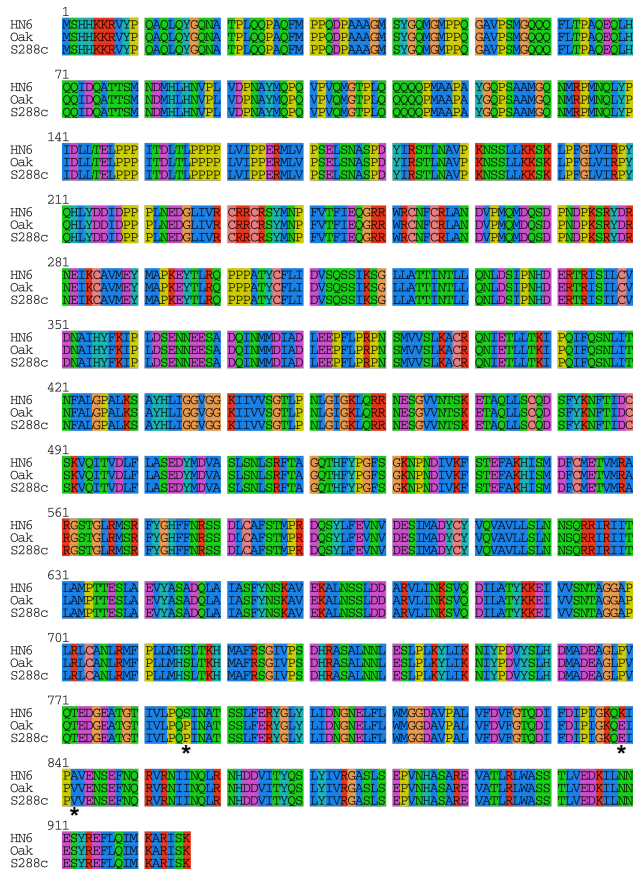

## B PSD1 Protein Alignment

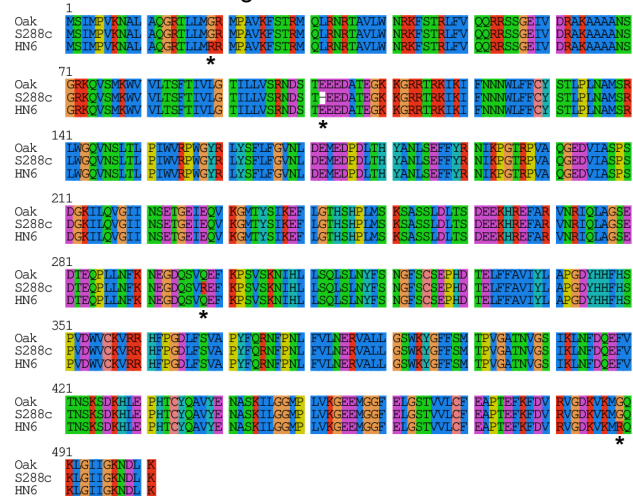

Figure S3. Protein alignment of HN6, Oak and S288c for *SEC24* (A) and *PSD1* (B). Differences between any of the three alleles are highlighted (\*).
