# Supplementary material
Source: publisher figshare collection journal article supplement (https://gsajournals.figshare.com/articles/dataset/_/7152065)
Supplement: Supplementary file 4 [file 1]

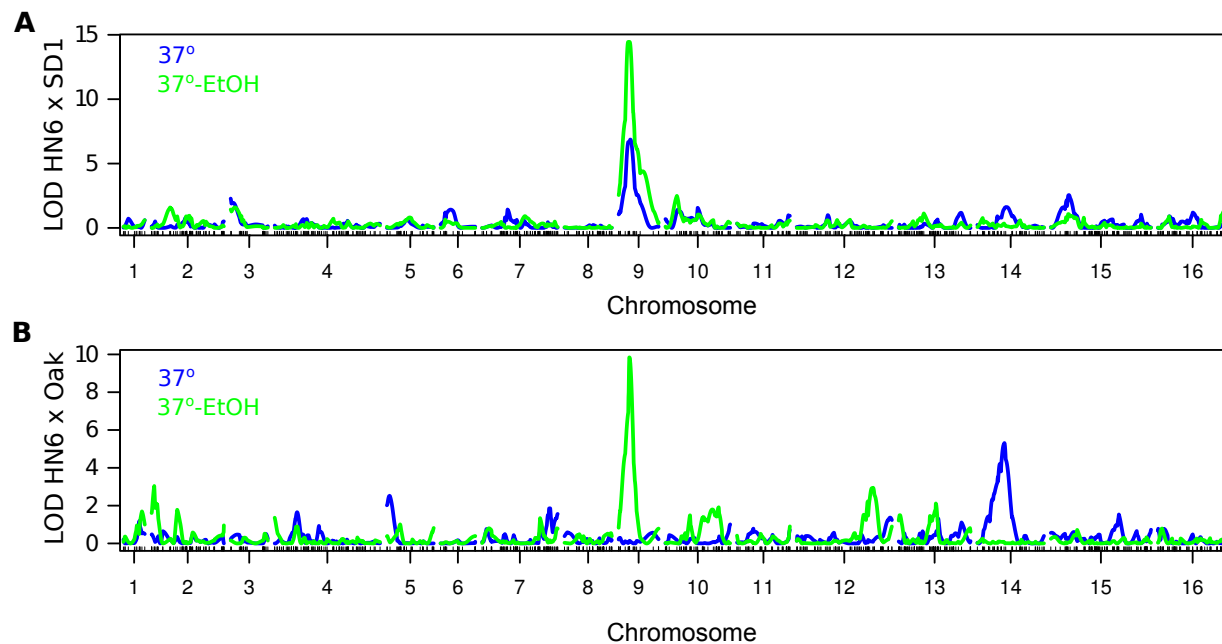

Figure S2. Logarithm of the odds ratio (LOD) of a quantitative trait locus for heat and ethanol tolerance at high temperature across the genome. (A) HN6 x SD1 recombinants and (B) HN6 x Oak recombinants, grown at 37° (blue) and 37° with 6% ethanol (green).
